# Supplementary material for: Bridging Systemic–Airway Discordance: Sputum Stratification and Effectiveness of Anti-IL-4R
Source: Research Square preprint supplement (doi:10.21203/rs.3.rs-8265219/v1), 2025-12-22

Fig. S1. Twelve-month remission rate stratified by sputum IL-6 quartiles (Min, minimum; Q1, first quartile; Q3, third quartile; max, maximum).

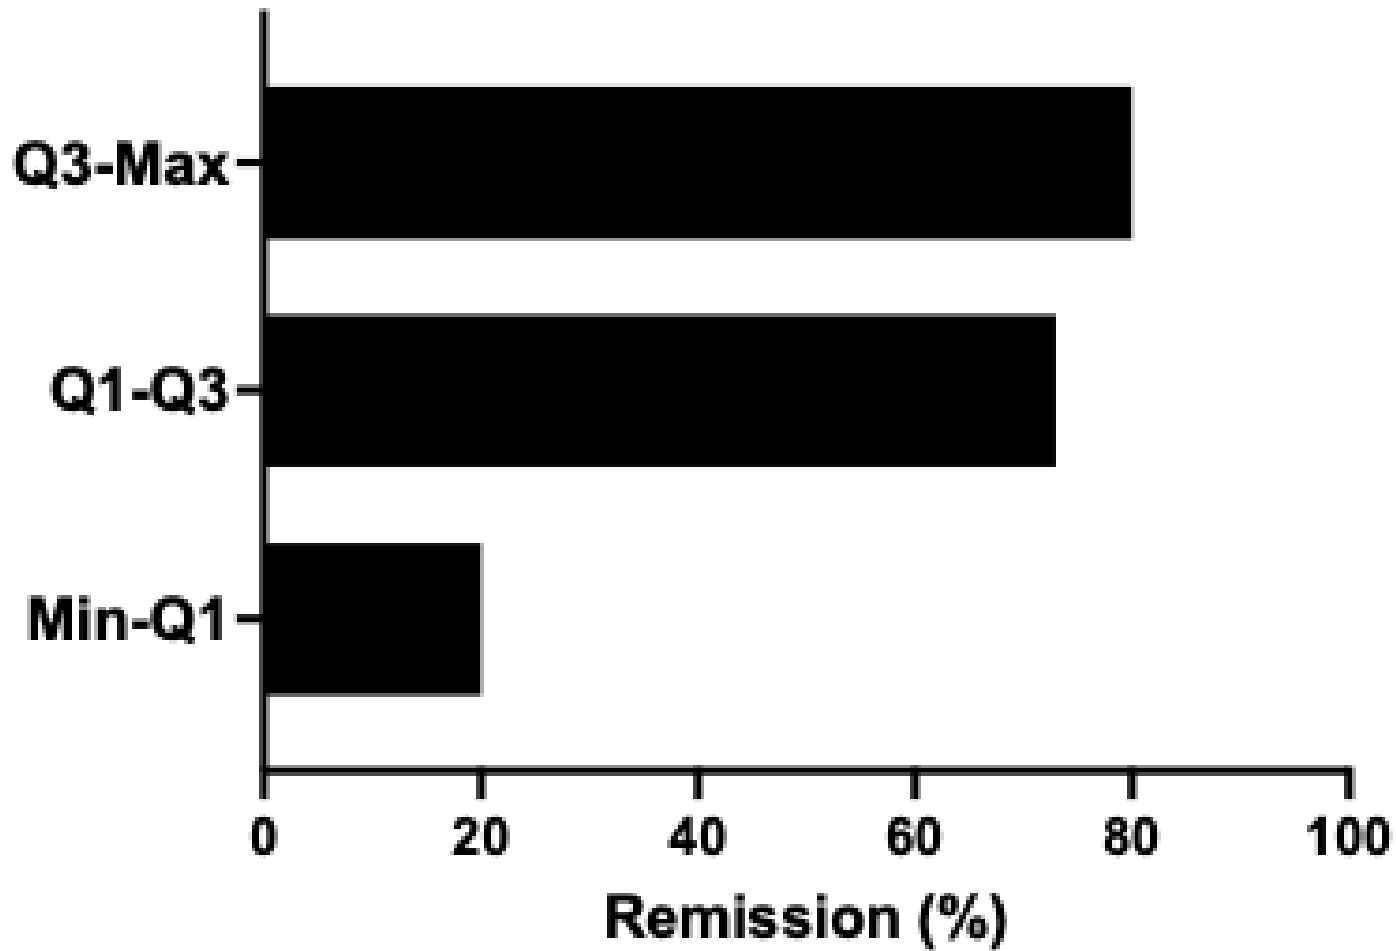

Supplement: Supplementary file 1 [file bec092a2cb833acdbbed1e8b.pdf]
